# Supplementary material
Source: Royal Society of Chemistry journal article supplement (doi:10.1039/d6nh00195e)
Supplement: d6nh00195e1.pdf [file d6nh00195e1.pdf]

## Synthesis and Characterization of Silver Nanowires and their Promising Anticancer effects

William Ghann<sup>1</sup>, Sk. Md. Atiqur Rahman<sup>2,3,4</sup>, Shabib M. Uddin<sup>1</sup>, Rokshana Ara Ruhi<sup>2,3,4</sup>, Md. Anwarul Kabir Bhuiya<sup>3\*</sup>, Md. Shahnawaz Parvez<sup>3</sup>, Mohsin Kazi<sup>5</sup>, Mohammed Muzibur Rahman<sup>6</sup>, ZMG Sarwar Jahangir<sup>7</sup>, Md. Abu Reza<sup>2</sup>, Mohammad Hossain Shariare<sup>8</sup> and Jamal Uddin<sup>1\*</sup>

<sup>1</sup>Center for Nanotechnology, Department of Natural Sciences, Coppin State University, 2500 W. North Ave, Baltimore, MD 21216, USA

<sup>2</sup>Molecular Biology and Protein Science Lab, Department of Genetic Engineering and Biotechnology, University of Rajshahi, Rajshahi-6205, Bangladesh

<sup>3</sup>Bio & Nanotechnology Research Lab, Department of Materials Science and Engineering, University of Rajshahi, Rajshahi-6205, Bangladesh

<sup>4</sup>Institute of Environmental Science, University of Rajshahi, Rajshahi-6205, Bangladesh

<sup>5</sup>Department of Pharmaceutical Sciences, King Saud University, Riyadh, KSA

<sup>6</sup>Center of Excellence for Advanced Materials Research (CEAMR) & Department of Chemistry, Faculty of Science, King Abdulaziz University, Jeddah 21589, P.O. Box 80203, KSA

<sup>7</sup>Department of Biological Sciences, KCC of the City University of New York, Brooklyn, NY 11235

<sup>8</sup>Department of Pharmaceutical Sciences, North South University, Dhaka, Bangladesh

Correspondence: Jamal Uddin ([juddin@coppin.edu](mailto:juddin@coppin.edu)) and Md. Anwarul Kabir Bhuiya ([mkabir@ru.ac.bd](mailto:mkabir@ru.ac.bd))

### 1. Supporting Information:

Supporting information for the **section 2.2** is given below which is stated as supplementary material in the manuscript.

**Supporting information Table:** Approximate Composition of Custom Mice Diet

Table S 1: Approximate Composition of Custom Mice Diet.

| <b>Serial No.</b> | <b>Ingredient</b>          | <b>Approximate Proportion (%)</b> |
|-------------------|----------------------------|-----------------------------------|
| 1                 | Ground corn                | 28.8%                             |
| 2                 | Soybean                    | 7.2%                              |
| 3                 | Bran (dietary fiber)       | 21.6%                             |
| 4                 | Wheat middlings            | 21.6%                             |
| 5                 | Plant-based protein        | 3.6%                              |
| 6                 | Salt                       | 1.4%                              |
| 7                 | L Premix (vitamin-mineral) | 1.4%                              |
|                   | <b>Total</b>               | <b>100%</b>                       |

All experimental protocols were reviewed and approved by the Institutional Animal, Medical Ethics, Biosafety, and Biosecurity Committee (**IAMEBBC**) for Experimentation on Animals, Humans, Microbes, and Living Natural Sources, Institute of Biological Sciences, University of Rajshahi, Bangladesh (**Memo No. 415(27)/320/IAMEBBC/IBSc**).
